# Supplementary figures and images for: Role of Nrf2 in Lipopolysaccharide-Induced Acute Kidney Injury: Protection by Human Umbilical Cord Blood Mononuclear Cells
Source: Hindawi journal article supplement (doi:10.1155/2020/6123459), 2020-07-28

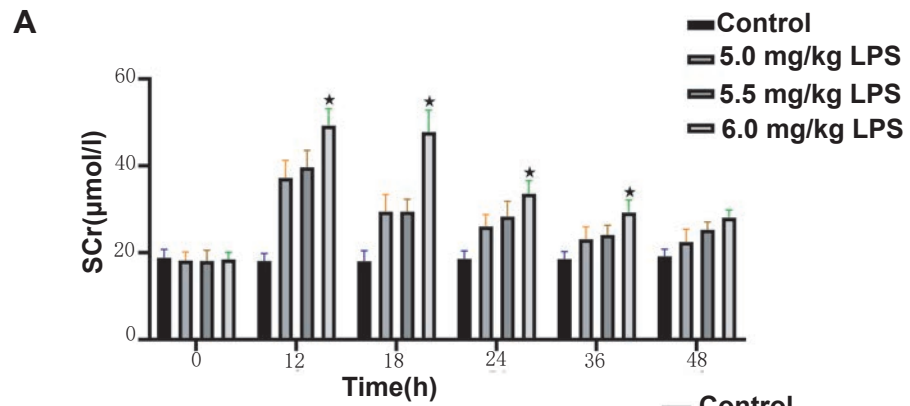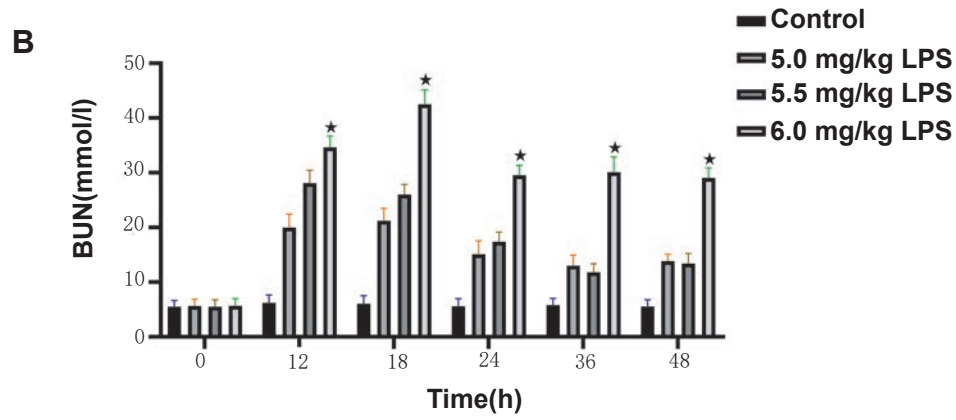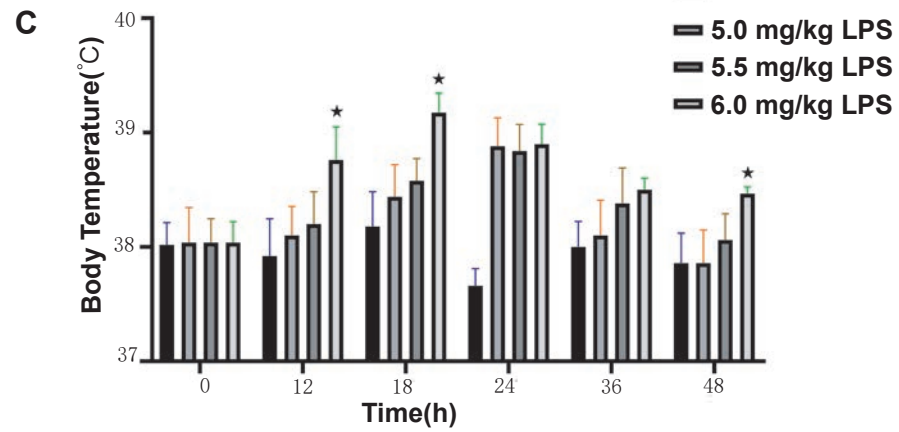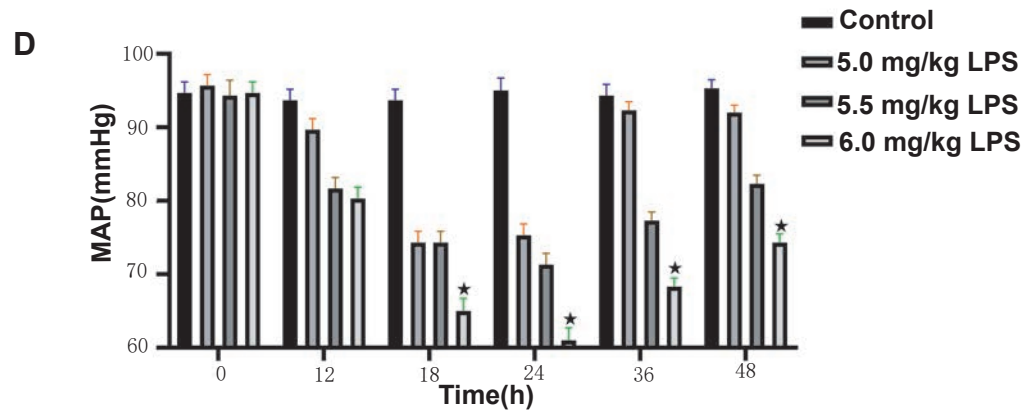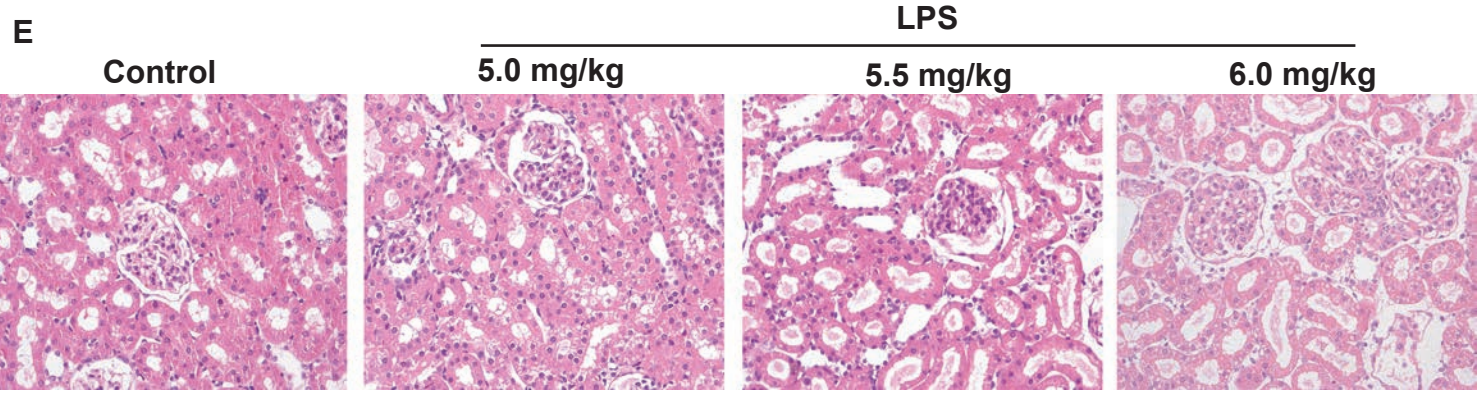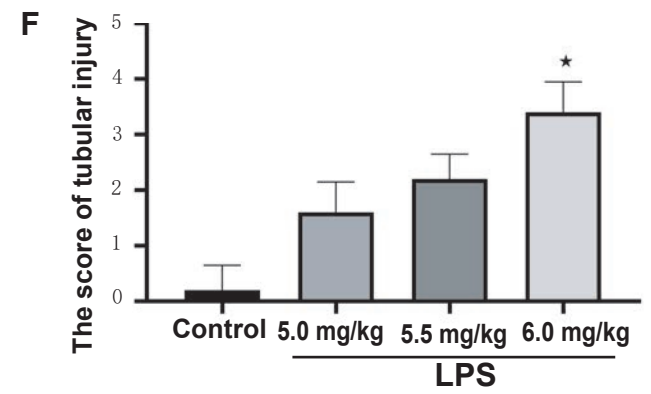

Supplement: f1 [file 6123459.f1.zip]

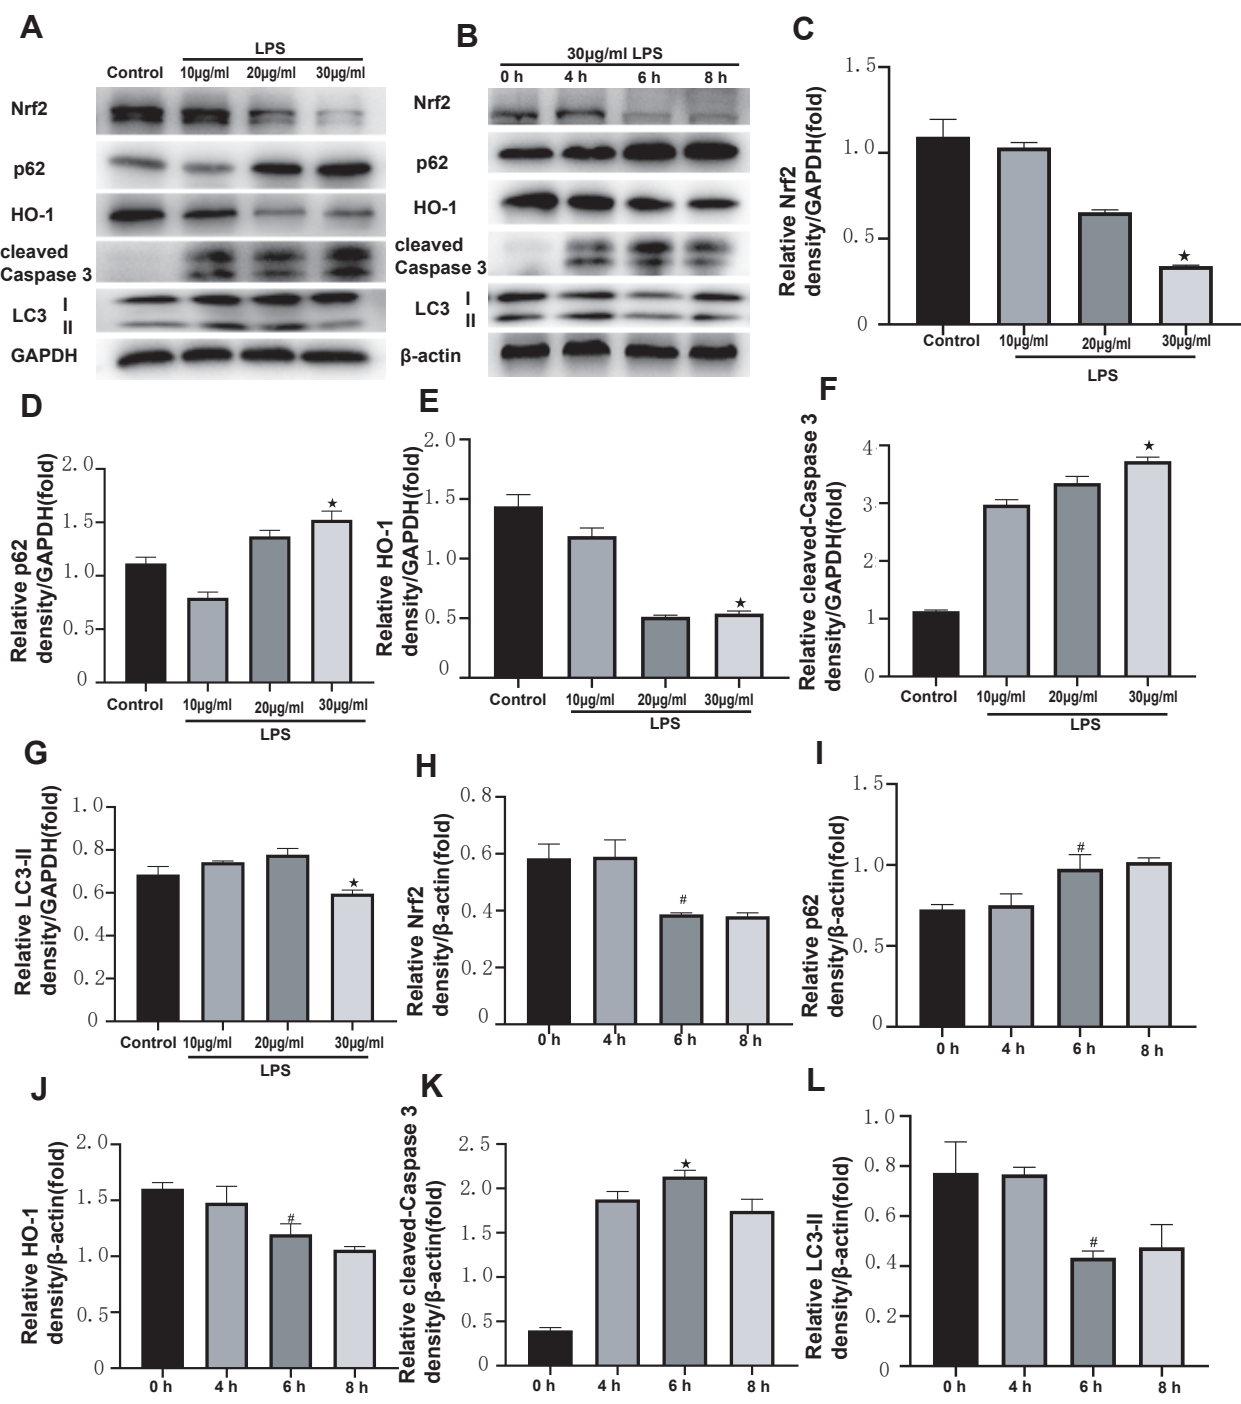

Supplement: f1 [file 6123459.f1.zip]
